# Supplementary material for: Allele-Specific PCR for KRAS Mutation Detection Using Phosphoryl Guanidine Modified Primers
Source: PubMed Central journal article supplement (PMC7692470; doi:10.3390/diagnostics10110872), 2020-10-26
Supplement: diagnostics-10-00872-s001.pdf [file diagnostics-10-00872-s001.pdf]

# Allele-Specific PCR for KRAS Mutation Detection Using Phosphoryl Guanidine Modified Primers

Alexey S. Chubarov\*, Igor P. Oscorbin, Maxim L. Filipenko, Alexander A. Lomzov and Dmitrii V. Pyshnyi\*

Institute of Chemical Biology and Fundamental Medicine, SB RAS, 8 Lavrentiev Avenue, 630090, Novosibirsk, Russia; [osc.igor@gmail.com](mailto:osc.igor@gmail.com) (I.O.); [max@niboch.nsc.ru](mailto:max@niboch.nsc.ru) (M.F.); [lomzov@niboch.nsc.ru](mailto:lomzov@niboch.nsc.ru) (A.L.)

\* Correspondence: [pyshnyi@niboch.nsc.ru](mailto:pyshnyi@niboch.nsc.ru), Tel.: +7(383)3635151 (D.P.); [chubarov@niboch.nsc.ru](mailto:chubarov@niboch.nsc.ru), [chubarovalesha@mail.ru](mailto:chubarovalesha@mail.ru); Tel.: +79137631420 (A.C.)

The influence of the number of PG groups and their position at 3'-terminus were investigated using AS-primers CTTC and CTGC (Table S1) and WT and KRAS G12A mutation plasmids as templates [1,2]. Bold symbols marked nucleotides means mismatched nucleotides in the relation to the wild-type DNA sequence. To determine assay reproducibility, several experiments were performed in 5 replicates with various amounts of the mutant template in the samples (Table S2). Standard curve data were generated for several native and phosphoryl guanidine (PG) modified primers for KRAS mutation detection and the PCR efficiency for each of these primers was calculated using Thermo Fisher Scientific online calculator (Figure S1-S3) [3]. All experiments had amplification efficiency more than 90% and a correlation coefficient  $R^2$  above 0.99. Allele-specific blocking PCR KRAS mutations detection assay results using blockers containing C\*T\*G\*G or G\*T\*G\*G 3'-terminal fragment are presented in Table S3.

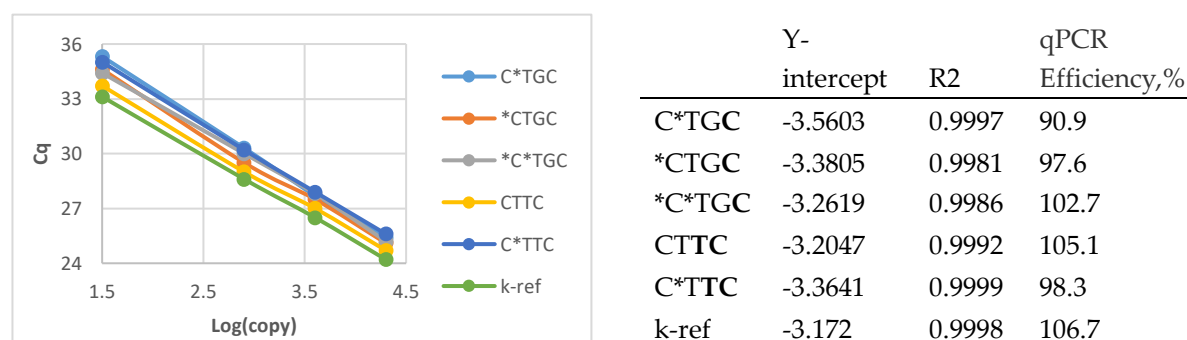

**Figure S1.** Cq values of KRAS G12A mutation detection using C\*TGC, \*CTGC, \*C\*TGC, CTTC, C\*TTC, k-ref primers and various amount of mutant DNA per reaction. Standard curves showing the PCR efficiency values for the several primers generated from a dilution series of mutant DNA.

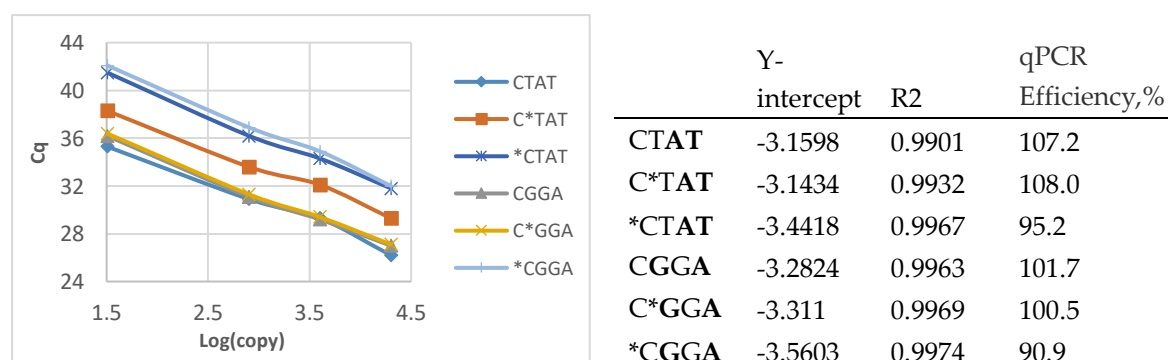

**Figure S2.** Cq values of KRAS G12V, G12D mutations detection using CTAT, C\*TAT, \*CTAT, CGGA, C\*GGA, \*CGGA primers and various amount of mutant DNA per reaction. Standard curves showing the PCR efficiency values for the several primers generated from a dilution series of mutant DNA.

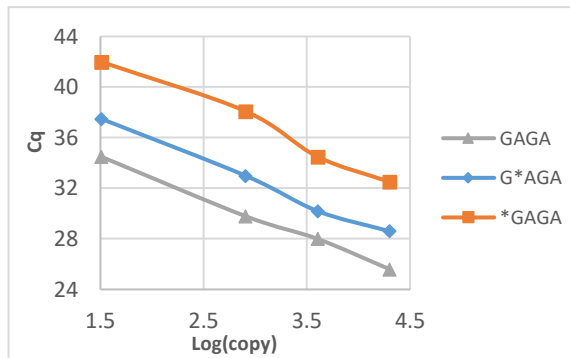

|              | Y-intercept | R2     | qPCR Efficiency, % |
|--------------|-------------|--------|--------------------|
| <b>GAGA</b>  | -3.1516     | 0.9979 | 107.6              |
| <b>G*AGA</b> | -3.2579     | 0.9944 | 102.7              |
| <b>*GAGA</b> | -3.4786     | 0.9852 | 93.9               |

**Figure S3.** Cq values of *KRAS* G13D mutations detection using **GAGA**, **G\*AGA**, **\*GAGA** primers and various amount of mutant DNA per reaction. Standard curves showing the PCR efficiency values for the several primers generated from a dilution series of mutant DNA.

**Table S1.** AS-PCR *KRAS* G12A mutation detection using CTGC and CTTC primers with PG-modification in the different phosphates from the 3'-end and mutant DNA mixed with wild-type DNA (total  $2 \times 10^5$  copies per reaction) at various ratios (% of mutant DNA)

| Primers | Cq         |            |            |
|---------|------------|------------|------------|
|         | WT         | 1%         | 100%       |
| CTGC    | 28.1±0.1   | 27.2±0.1   | 24.0±0.1   |
| C*TGC   | 33.8±0.2   | 28.3±0.1   | 21.9±0.1   |
| *CTGC   | 37.4±0.2   | 28.1±0.05  | 22.2±0.2   |
| *C*TGC  | N/A        | 29.8±0.2   | 23.4±0.1   |
| CTG*C   | 36.9±0.2   | 30.3±0.2   | 24.1±0.1   |
| CT*GC   | 36.8±0.4   | 31.4±0.1   | 25.3±0.1   |
| *CTG*C  | N/A        | 37.2±0.2   | 27.7±0.2   |
| C*TG*C  | N/A        | 34.9±0.5   | 29.5±0.2   |
| CTTC    | 34.25±0.05 | 28.7±0.1   | 21.72±0.02 |
| C*TTC   | N/A        | 29.65±0.07 | 23.8±0.2   |
| CT*TC   | N/A        | 33.24±0.01 | 26.8±0.2   |
| CTT*C   | N/A        | 33.5±0.1   | 26.67±0.01 |
| C*TT*C  | N/A        | 36.4±0.2   | 29.2±0.1   |
| *C*TTC  | N/A        | 37.9±0.1   | 32.0±0.1   |
| C*T*TC  | N/A        | 40.9±0.2   | 34.8±0.1   |
| *CTT*C  | N/A        | N/A        | 40.1±0.3   |
| CT*T*C  | N/A        | N/A        | N/A        |

NTC (No Template Control) was undetermined in all the reactions, N/A indicates that no Cq was obtained for a typical 45-cycle reaction. Symbol "\*" means PG modification location. Boldly marked nucleotides mean mismatched nucleotides in relation to the wild-type DNA sequence

**Table S2.** AS-PCR reproducibility G12A *KRAS* mutation detection using wild-type DNA (total  $2 \times 10^4$  copies per reaction) and 1% mutant DNA in the background of wild-type DNA

| Primers | Cq   |       |       |
|---------|------|-------|-------|
|         | WT   | 1%    |       |
| k-ref   | 1    | 25.73 | 25.21 |
|         | 2    | 25.53 | 25.23 |
|         | 3    | 25.72 | 25.17 |
|         | 4    | 25.66 | 24.86 |
|         | 5    | 25.20 | 24.76 |
|         | aver | 25.57 | 25.05 |
|         | SD   | 0.22  | 0.22  |
| CTTC    | 1    | 36.55 | 31.43 |
|         | 2    | 35.79 | 31.64 |
|         | 3    | 36.17 | 31.66 |
|         | 4    | 35.42 | 31.22 |
|         | 5    | 36.26 | 31.29 |
|         | aver | 36.04 | 31.45 |
|         | SD   | 0.44  | 0.20  |
| C*TTC   | 1    | N/A   | 33.13 |
|         | 2    | N/A   | 33.11 |
|         | 3    | N/A   | 32.70 |
|         | 4    | N/A   | 32.67 |
|         | 5    | N/A   | 33.00 |
|         | aver | -     | 32.92 |
|         | SD   | -     | 0.22  |

**Table S3.** ASB-PCR KRAS mutations detection of various mutant/wild-type DNA ratio (total 2×10<sup>4</sup> or 2×10<sup>5</sup> copies per reaction)

| Primers                | Cq                       |          |          |          | $\Delta Cq$<br>Cq(WT) - Cq(1%) |                   |      |
|------------------------|--------------------------|----------|----------|----------|--------------------------------|-------------------|------|
|                        | 2×10 <sup>4</sup> copies |          |          |          | 2×10 <sup>4</sup>              | 2×10 <sup>5</sup> |      |
|                        | 1%                       | 0.1%     | 0.01%    | WT       | copies                         | copies            |      |
| G12A                   | No blocker CTGG          | 24.6±0.2 | 24.8±0.2 | 25.0±0.3 | 25.0±0.2                       | 0.4               | -    |
|                        | Blocker C*T*G*G          | N/A      | N/A      | N/A      | N/A                            | -                 | -    |
|                        | No blocker CTTC          | 31.5±0.1 | 33.9±0.1 | 34.2±0.2 | 36.7±0.2                       | 5.2               | 5.7  |
|                        | CTTC/C*T*G*G = 1/5, 1/2  | N/A      | N/A      | N/A      | N/A                            | -                 | -    |
|                        | CTTC/C*T*G*G = 1/1       | N/A      | N/A      | N/A      | N/A                            | -                 | -    |
|                        | CTTC/C*T*G*G = 1/0.5     | 41.6±0.3 | N/A      | N/A      | N/A                            | -                 | -    |
|                        | CTTC/C*T*G*G = 1/0.25    | 37.0±0.6 | 40.1±1.1 | N/A      | N/A                            | -                 | -    |
|                        | CTTC/C*T*G*G = 1/0.1     | 34.5±0.1 | 38.0±0.2 | N/A      | N/A                            | 10.5 <sup>a</sup> | 10.7 |
|                        | C*TTC/C*T*G*G = 1/5, 1/2 | N/A      | N/A      | N/A      | N/A                            | -                 | -    |
|                        | C*TTC/C*T*G*G = 1/1      | 41.7±1.5 | N/A      | N/A      | N/A                            | -                 | -    |
|                        | C*TTC/C*T*G*G = 1/0.5    | 33.0±0.2 | 37.3±0.5 | 41.8±1.0 | N/A                            | 12.0 <sup>a</sup> | 10.1 |
|                        | C*TTC/C*T*G*G = 1/0.25   | 32.5±0.1 | 36.3±0.3 | 38.2±0.4 | N/A                            | 12.5 <sup>a</sup> | 14.2 |
|                        | C*TTC/C*T*G*G = 1/0.1    | 31.7±0.1 | 34.9±0.1 | 38.0±0.3 | 39.8±0.9                       | 8.1               | -    |
|                        | C*TGC/C*T*G*G = 1/1      | 37.4±0.5 | N/A      | N/A      | N/A                            | -                 | -    |
|                        | C*TGC/C*T*G*G = 1/0.5    | 34.8±0.1 | 39.3±0.4 | 43.0±1.8 | N/A                            | 10.2 <sup>a</sup> | 9.7  |
| C*TGC/C*T*G*G = 1/0.25 | 33.1±0.1                 | 37.5±0.2 | 40.1±0.5 | 42.4±1.5 | 9.3                            | 9.2               |      |
| C*TGC/C*T*G*G = 1/0.1  | 32.3±0.1                 | 36.4±0.3 | 38.7±0.7 | 39.0±1.0 | 6.7                            | -                 |      |
| G12V                   | No blocker CTAT          | 30.6±0.1 | 30.8±0.2 | 31.4±0.2 | 31.6±0.2                       | 1.0               | -    |
|                        | No blocker C*TAT         | 31.5±0.1 | 35.3±0.2 | 36.7±0.4 | 37.3±0.5                       | 5.8               | -    |
|                        | C*TAT /C*T*G*G = 1/0.5   | 41.3±1.0 | N/A      | N/A      | N/A                            | -                 | -    |
|                        | C*TAT /C*T*G*G = 1/0.25  | 39.3±0.8 | N/A      | N/A      | N/A                            | -                 | 8.8  |
|                        | C*TAT /C*T*G*G = 1/0.1   | 36.0±0.2 | 37.5±0.4 | 40.3±1.0 | N/A                            | 9.0 <sup>a</sup>  | 8.8  |
| G12D                   | No blocker CGGA          | 33.2±0.1 | 36.0±0.3 | 37.0±0.5 | 37.1                           | 3.8               | -    |
|                        | C*GGA/C*T*G*G = 1/0.5    | 35.5±0.2 | 39.8±1.0 | N/A      | N/A                            | 10.5 <sup>a</sup> | -    |
|                        | C*GGA/C*T*G*G = 1/0.25   | 33.7±0.1 | 37.3±0.5 | N/A      | N/A                            | 11.3 <sup>a</sup> | 9.8  |
|                        | C*GGA/C*T*G*G = 1/0.1    | 33.6±0.1 | 37.1±0.6 | 39.2±0.9 | N/A                            | 11.4 <sup>a</sup> | 9.8  |
| G13D                   | No blocker GTGG          | 23.5±0.1 | 24.0±0.2 | 24.1±0.1 | 24.2±0.3                       | 0.7               | -    |
|                        | Blocker G*T*G*G          | N/A      | N/A      | N/A      | N/A                            | -                 | -    |
|                        | No blocker GAGA          | 31.1±0.1 | 33.1±0.2 | 33.6±0.3 | 35.2±0.2                       | 4.1               | -    |
|                        | GAGA/G*T*G*G = 1/0.1     | 31.7±0.1 | 33.8±0.2 | N/A      | N/A                            | 13.3 <sup>a</sup> | 8.8  |
|                        | G*AGA/ G*T*G*G = 1/0.5   | 38.8±0.7 | N/A      | N/A      | N/A                            | -                 | 9.3  |
|                        | G*AGA/ G*T*G*G = 1/0.25  | 36.2±0.2 | 43.0±1.5 | N/A      | N/A                            | 8.8 <sup>a</sup>  | 9.5  |
|                        | G*AGA/G*T*G*G = 1/0.1    | 35.3±0.4 | 39.2±0.8 | 41.0±1.3 | N/A                            | 9.7 <sup>a</sup>  | 10.9 |

NTC (No Template Control) was undetermined in all the reactions, N/A indicates that no Cq was obtained for a typical 45-cycle reaction. Symbol “\*” means PG modification location. Boldly marked nucleotides mean mismatched nucleotides in relation to the wild-type DNA sequence. Real-time PCR assay was done using a constant 450 nM AS-primers concentration and several blocker primers excess. <sup>a</sup>If Cq(WT) = N/A to calculate  $\Delta Cq = Cq(WT) - Cq(1\%)$  value Cq(WT) = 45 was used.

## References

1. Takeda, S.; Ichii, S.; Nakamura, Y. Detection of Kras mutation in sputum by mutant allelespecific amplification (MASA). *Hum. Mutat.* **1993**, *2*, 112–117, doi:10.1002/humu.1380020209.
2. Lang, A.H.; Drexel, H.; Geller-Rhomberg, S.; Stark, N.; Winder, T.; Geiger, K.; Muendlein, A. Optimized allele-specific real-time PCR assays for the detection of common mutations in KRAS and BRAF. *J. Mol. Diagnostics* **2011**, *13*, 23–28, doi:10.1016/j.jmoldx.2010.11.007.
3. Thermo Fisher Scientific qPCR Efficiency Calculator Available online: <https://www.thermofisher.com/ru/ru/home/brands/thermo-scientific/molecular-biology/molecular-biology-learning-center/molecular-biology-resource-library/thermo-scientific-web-tools/qpcr-efficiency-calculator.html>.
